# Supplementary material
Source: Springer Nature journal article supplement (https://www.springermedizin.de/resource/supplementary/12960_2013_354_MOESM1_ESM.pdf/9569914)
Supplement: MOESM1 [file 9569914]

## Additional file 1

**Additional Table 1– Interviews in Portugal**

| Thematic areas                               | Local Health Units or Hospitals Centre ( <i>Centro Hospitalar</i> )                                                                                                                                                                                     |                                                                                                                                                                                                                                                                                              |                                                                                                                                                                                                                                   |                                                                                                                                                               |
|----------------------------------------------|---------------------------------------------------------------------------------------------------------------------------------------------------------------------------------------------------------------------------------------------------------|----------------------------------------------------------------------------------------------------------------------------------------------------------------------------------------------------------------------------------------------------------------------------------------------|-----------------------------------------------------------------------------------------------------------------------------------------------------------------------------------------------------------------------------------|---------------------------------------------------------------------------------------------------------------------------------------------------------------|
|                                              | Nordeste Hospital Centre<br>(only hospital units)                                                                                                                                                                                                       | Cova da Beira Hospital<br>Center<br>(only hospital units)                                                                                                                                                                                                                                    | Norte Alentejano Local<br>Health Unit<br>(Hospital units and groups<br>of health centres)                                                                                                                                         | Baixo Alentejo Local Health<br>Unit<br>(Hospital units and group of<br>health centres)                                                                        |
| <b>Characterization<br/>of professionals</b> | <p>18 physicians<br/>12 Bragança<br/>6 Mirandela</p> <p>13 specialists<br/>3 general practitioners<br/>2 residents (internship)</p> <p>General practitioners live in Spain and work in Portugal and specialists live in Portugal.</p>                   | <p>7 nurses</p> <p>12 physicians</p> <p>8 hospital specialists<br/>4 residents (interns)</p> <p>Those are integrated and live in Portugal.</p>                                                                                                                                               | <p>44 physicians</p> <p>In hospitals<br/>17 specialists<br/>2 residents (interns)</p> <p>In Health Centres<br/>23 general practitioners<br/>2 residents (interns)</p> <p>None of the general practitioners lives in Portugal.</p> | <p>29 physicians</p> <p>20 physicians: specialists in internal medicine and general practitioners<br/>9 residents (interns)</p> <p>Most live in Portugal.</p> |
| <b>Reasons for mobility</b>                  | <p>1 – Professional development: to do a residency;</p> <p>2 – Availability of positions in the interior of Portugal and better salaries;</p> <p>3 – Better technical conditions to perform the work (team work, availability of surgery rooms,...)</p> | <p>1 – Difficulty in getting job in Spain (at present improved and there is less mobility from Spain to Portugal);</p> <p>2 – Availability of positions in the interior of Portugal and better salaries;</p> <p>3 – This hospital is an accredited one and stands for high quality care.</p> | <p>1 – Availability of positions in the interior of Portugal and better salaries (at present this reason is decreasing as better opportunities in Spain increase);</p> <p>2 - Professional development: residency</p>             | <p>1 – Availability of positions in the interior of Portugal and better salaries</p>                                                                          |

## Additional file 1

**Additional table 1 – Interviews in Portugal (contd)**

| Thematic areas                  | Local Health Units or Hospitals Centre Complex ( <i>Centro Hospitalar</i> )                                               |                                                                                                                                                                                                                                        |                                                                                                                                                                                    |                                                                                                                                                                                              |
|---------------------------------|---------------------------------------------------------------------------------------------------------------------------|----------------------------------------------------------------------------------------------------------------------------------------------------------------------------------------------------------------------------------------|------------------------------------------------------------------------------------------------------------------------------------------------------------------------------------|----------------------------------------------------------------------------------------------------------------------------------------------------------------------------------------------|
|                                 | Nordeste Hospital Center Complex<br>(only hospital units)                                                                 | Cova da Beira Hospital Center Complex<br>(only hospital units)                                                                                                                                                                         | Norte Alentejano Local Health Unit<br>(Hospital units and groups of health centres)                                                                                                | Baixo Alentejo Local Health Unit<br>(Hospital units and groups of health centres)                                                                                                            |
| <b>Consequences of mobility</b> | Very positive view:<br>Improved supply of specialist care;<br>Helps address the problem of limited access to medical care | Very positive view:<br>Improved supply of specialist care;<br>Helps address the problem of limited access to medical care                                                                                                              | Very positive view:<br>Improved supply of specialist care;<br>Helps address the problem of limited access to medical care                                                          | Very positive view:<br>Improved supply of specialist care;<br>Helps address the problem of limited access to medical care<br><br>Problem: language difficulties in patient-physician contact |
| <b>Incentives</b>               | Increase of income with extra work in emergency room.<br>No incentive policy due to financial restrictions.               | No incentive policy.<br>Offer of salaries equals the salaries of Public servants even if different kind of contract.<br>This is an accredited and University hospital and is among the first five better classified at national level. |                                                                                                                                                                                    | Accommodation offer limited for financial restrictions.<br>Access to a residency is also pointed as an incentive.                                                                            |
| <b>Other</b>                    |                                                                                                                           |                                                                                                                                                                                                                                        | Problems with degrees recognition.<br>Some lack of fairness perceived by professionals with regard to different types of contracts (and salaries) that present legislation allows. |                                                                                                                                                                                              |

## Additional file 1

**Additional Table 2 – Interviews in Spain**

| Thematic areas                           | Hospitals                                                                                                                                             |                                                                                                                              |                                                                                                                                                              |                                                                                                                                                      |
|------------------------------------------|-------------------------------------------------------------------------------------------------------------------------------------------------------|------------------------------------------------------------------------------------------------------------------------------|--------------------------------------------------------------------------------------------------------------------------------------------------------------|------------------------------------------------------------------------------------------------------------------------------------------------------|
|                                          | Hospital of Santisima Trinidad, Salamanca                                                                                                             | Sanatorio of Santa María, Pontevedra                                                                                         | Juan Ramón Jimenez Hospital, Huelva                                                                                                                          | Miguel Dominguez Hospital, Pontevedra                                                                                                                |
| <b>Characterization of professionals</b> | 2 nurses                                                                                                                                              | 12 nurses in recent years, 2 at the moment of the interview.                                                                 | 1 nurse occasionally                                                                                                                                         | 23 nurses<br><br>The organization started hiring Portuguese nurses in 2007<br><br>Most of them stay in Spain 1 or 2 years.                           |
| <b>Reasons for mobility</b>              | 1 – Availability of positions.                                                                                                                        | 1 – Difficulty in getting job in Portugal<br>2 – Availability of positions.                                                  | 1 – Difficulty in getting job in Portugal<br><br>Mobility trends are stronger from Spain to Portugal.                                                        | 1 – Availability of positions.<br>2 – Difficulty in getting job in Portugal.                                                                         |
| <b>Consequences of mobility</b>          | Positive view:<br>It solves the problem of scarcity of medical care; Portuguese professionals considered as having good attitudes and qualifications. | Positive view:<br>No negative consequences; Portuguese professionals considered as having good attitudes and qualifications. | Positive view:<br>It solves the problem of scarcity of medical care; No differences between Spanish and Portuguese professionals in terms of qualifications. | Positive view:<br>Portuguese professionals considered as having good attitudes and qualifications; It solves the problem of scarcity of medical care |
